# Supplementary material for: Interfacial effects of crystal surface through free quinolinyl groups on crystal organization and catalysis
Source: Royal Society of Chemistry journal article supplement (doi:10.1039/c5ce00527b), 2015-01-01
Supplement: c5ce00527b1.pdf [file c5ce00527b1.pdf]

<Electronic Supplementary Information>

**Interfacial effects of crystal surface through free quinolinyl groups on  
crystal organization and catalysis**

Byung Joo Kim, Haeri Lee, Tae Hwan Noh and Ok-Sang Jung\*

*Department of Chemistry, Pusan National University, Pusan 609-735, Korea*

**Table S1** Crystal refinement parameters for [CuCl<sub>2</sub>L]<sub>2</sub>, [CuBr<sub>2</sub>L]<sub>2</sub>, [HgCl<sub>2</sub>L]<sub>2</sub>, and [HgBr<sub>2</sub>L]<sub>2</sub>

|                                                                 | [CuCl <sub>2</sub> L] <sub>2</sub>                                                                 | [CuBr <sub>2</sub> L] <sub>2</sub>                                                                 | [HgCl <sub>2</sub> L] <sub>2</sub>                                                                 | [HgBr <sub>2</sub> L] <sub>2</sub>                                                                 |
|-----------------------------------------------------------------|----------------------------------------------------------------------------------------------------|----------------------------------------------------------------------------------------------------|----------------------------------------------------------------------------------------------------|----------------------------------------------------------------------------------------------------|
| Formula                                                         | 1/2 C <sub>72</sub> H <sub>42</sub> Cl <sub>4</sub> Cu <sub>2</sub> N <sub>6</sub> O <sub>12</sub> | 1/2 C <sub>72</sub> H <sub>42</sub> Br <sub>4</sub> Cu <sub>2</sub> N <sub>6</sub> O <sub>12</sub> | 1/2 C <sub>72</sub> H <sub>42</sub> Cl <sub>4</sub> Hg <sub>2</sub> N <sub>6</sub> O <sub>12</sub> | 1/2 C <sub>72</sub> H <sub>42</sub> Br <sub>4</sub> Hg <sub>2</sub> N <sub>6</sub> O <sub>12</sub> |
| <i>M<sub>w</sub></i>                                            | 726.00                                                                                             | 814.92                                                                                             | 863.05                                                                                             | 951.97                                                                                             |
| Crystal system                                                  | Orthorhombic                                                                                       | Orthorhombic                                                                                       | Orthorhombic                                                                                       | Orthorhombic                                                                                       |
| Space group                                                     | <i>Cmca</i>                                                                                        | <i>Cmca</i>                                                                                        | <i>Cmca</i>                                                                                        | <i>Cmca</i>                                                                                        |
| <i>a</i> [Å]                                                    | 26.648(3)                                                                                          | 26.8621(2)                                                                                         | 26.7895(7)                                                                                         | 26.8929(9)                                                                                         |
| <i>b</i> [Å]                                                    | 14.3871(1)                                                                                         | 14.5732(8)                                                                                         | 14.5479(4)                                                                                         | 14.6597(4)                                                                                         |
| <i>c</i> [Å]                                                    | 15.1191(1)                                                                                         | 15.1408(7)                                                                                         | 15.1124(5)                                                                                         | 15.0879(4)                                                                                         |
| <i>V</i> [Å <sup>3</sup> ]                                      | 5796.6(8)                                                                                          | 5927.1(6)                                                                                          | 5889.8(3)                                                                                          | 5948.3(3)                                                                                          |
| <i>Z</i>                                                        | 8                                                                                                  | 8                                                                                                  | 8                                                                                                  | 8                                                                                                  |
| $\rho$ [g cm <sup>-3</sup> ]                                    | 1.664                                                                                              | 1.826                                                                                              | 1.947                                                                                              | 2.126                                                                                              |
| $\mu$ [mm <sup>-1</sup> ]                                       | 0.996                                                                                              | 3.491                                                                                              | 5.465                                                                                              | 7.919                                                                                              |
| F(000)                                                          | 2952                                                                                               | 3240                                                                                               | 3360                                                                                               | 3648                                                                                               |
| Index ranges                                                    | -32 ≤ <i>h</i> ≤ 32<br>-17 ≤ <i>k</i> ≤ 17<br>-18 ≤ <i>l</i> ≤ 18                                  | -33 ≤ <i>h</i> ≤ 32<br>-17 ≤ <i>k</i> ≤ 17<br>-18 ≤ <i>l</i> ≤ 18                                  | -33 ≤ <i>h</i> ≤ 33<br>-18 ≤ <i>k</i> ≤ 18<br>-18 ≤ <i>l</i> ≤ 18                                  | -33 ≤ <i>h</i> ≤ 33<br>-18 ≤ <i>k</i> ≤ 17<br>-18 ≤ <i>l</i> ≤ 18                                  |
| Completeness                                                    | 100.0% ( $\theta = 25.99^\circ$ )                                                                  | 100.0% ( $\theta = 25.99^\circ$ )                                                                  | 100.0% ( $\theta = 26.49^\circ$ )                                                                  | 100.0% ( $\theta = 26.50^\circ$ )                                                                  |
| <i>R</i> <sub>int</sub>                                         | 0.1597                                                                                             | 0.1261                                                                                             | 0.0531                                                                                             | 0.0981                                                                                             |
| Goodness-of-fit                                                 | 2.242                                                                                              | 2.353                                                                                              | 2.433                                                                                              | 1.986                                                                                              |
| <i>R</i> <sub>1</sub> [ <i>I</i> > 2σ( <i>I</i> )] <sup>a</sup> | 0.2272                                                                                             | 0.2047                                                                                             | 0.1679                                                                                             | 0.1384                                                                                             |
| <i>wR</i> <sub>2</sub> (all data) <sup>b</sup>                  | 0.5743                                                                                             | 0.5770                                                                                             | 0.5272                                                                                             | 0.4686                                                                                             |

<sup>a</sup> $R_1 = \frac{\sum ||F_o| - |F_c||}{\sum |F_o|}$ , <sup>b</sup> $wR_2 = \left( \frac{\sum [w(F_o^2 - F_c^2)^2]}{\sum [w(F_o^2)^2]} \right)^{1/2}$

**Table S2** Selected bond lengths and [ $\text{\AA}$ ] and angles [ $^\circ$ ] for  $[\text{CuCl}_2\text{L}]_2$ ,  $[\text{CuBr}_2\text{L}]_2$ ,  $[\text{HgCl}_2\text{L}]_2$ , and  $[\text{HgBr}_2\text{L}]_2$

| $[\text{CuCl}_2\text{L}]_2$                   |            | $[\text{CuBr}_2\text{L}]_2$     |            |
|-----------------------------------------------|------------|---------------------------------|------------|
| Cu(1)–N(1)                                    | 2.120(1)   | Cu(1)–N(1)                      | 2.117(2)   |
| Cu(1)–N(1) <sup>#1</sup>                      | 2.120(1)   | Cu(1)–N(1) <sup>#3</sup>        | 2.117(2)   |
| Cu(1)–Cl(1)                                   | 2.224(5)   | Cu(1)–Br(1)                     | 2.381(3)   |
| Cu(1)–Cl(1) <sup>#1</sup>                     | 2.224(5)   | Cu(1)–Br(1) <sup>#3</sup>       | 2.381(3)   |
| Cu(1)⋯Cu(1) <sup>#2</sup>                     | 17.9791(2) | Cu(1)⋯Cu(1) <sup>#4</sup>       | 17.9807(1) |
| <hr/>                                         |            |                                 |            |
| N(1)–Cu(1)–N(1) <sup>#1</sup>                 | 151.5(7)   | N(1)–Cu(1)–N(1) <sup>#3</sup>   | 155.3(1)   |
| Cl(1)–Cu(1)–Cl(1) <sup>#1</sup>               | 151.7(3)   | Br(1)–Cu(1)–Br(1) <sup>#3</sup> | 147.2(2)   |
| N(1)–Cu(1)–Cl(1)                              | 95.0(3)    | N(1)–Cu(1)–Br(1)                | 97.0(4)    |
| N(1)–Cu(1)–Cl(1) <sup>#1</sup>                | 91.9(4)    | N(1) <sup>#3</sup> –Cu(1)–Br(1) | 89.9(5)    |
| N(1) <sup>#1</sup> –Cu(1)–Cl(1) <sup>#1</sup> | 95.0(4)    | N(1)–Cu(1)–Br(1) <sup>#3</sup>  | 89.9(5)    |
| <hr/>                                         |            |                                 |            |
| $[\text{HgCl}_2\text{L}]_2$                   |            | $[\text{HgBr}_2\text{L}]_2$     |            |
| Hg(1)–N(1)                                    | 2.529(1)   | Hg(1)–N(1)                      | 2.531(1)   |
| Hg(1)–N(1) <sup>#5</sup>                      | 2.529(1)   | Hg(1)–N(1) <sup>#7</sup>        | 2.531(1)   |
| Hg(1)–Cl(1)                                   | 2.368(6)   | Hg(1)–Br(1)                     | 2.481(3)   |
| Hg(1)–Cl(1) <sup>#5</sup>                     | 2.368(6)   | Hg(1)–Br(1) <sup>#7</sup>       | 2.481(3)   |
| Hg(1)⋯Hg(1) <sup>#6</sup>                     | 19.3120(5) | Hg(1)⋯Hg(1) <sup>#8</sup>       | 19.3374(6) |
| <hr/>                                         |            |                                 |            |
| N(1)–Hg(1)–N(1) <sup>#5</sup>                 | 128.7(7)   | N(1)–Hg(1)–N(1) <sup>#7</sup>   | 125.4(6)   |
| Cl(1)–Hg(1)–Cl(1) <sup>#5</sup>               | 167.9(3)   | Br(1)–Hg(1)–Br(1) <sup>#7</sup> | 166.26(2)  |
| N(1)–Hg(1)–Cl(1) <sup>#5</sup>                | 90.8(3)    | N(1)–Hg(1)–Br(1)                | 94.5(3)    |
| N(1) <sup>#5</sup> –Hg(1)–Cl(1)               | 90.8(3)    | N(1) <sup>#7</sup> –Hg(1)–Br(1) | 91.8(3)    |
| N(1) <sup>#5</sup> –Hg(1)–Cl(1) <sup>#5</sup> | 94.5(3)    | N(1)–Hg(1)–Br(1) <sup>#7</sup>  | 91.8(3)    |

<sup>#1</sup> $x, -y, -z+2$ , <sup>#2</sup> $-x, -y, 2-z$ , <sup>#3</sup> $x, -y, -z+1$ , <sup>#4</sup> $-x, -y, 1-z$ , <sup>#5</sup> $x, -y+2, -z+1$ , <sup>#6</sup> $-x, 2-y, 1-z$ , <sup>#7</sup> $x, -y+1, -z+2$ , <sup>#8</sup> $-x, 1-y, 2-z$

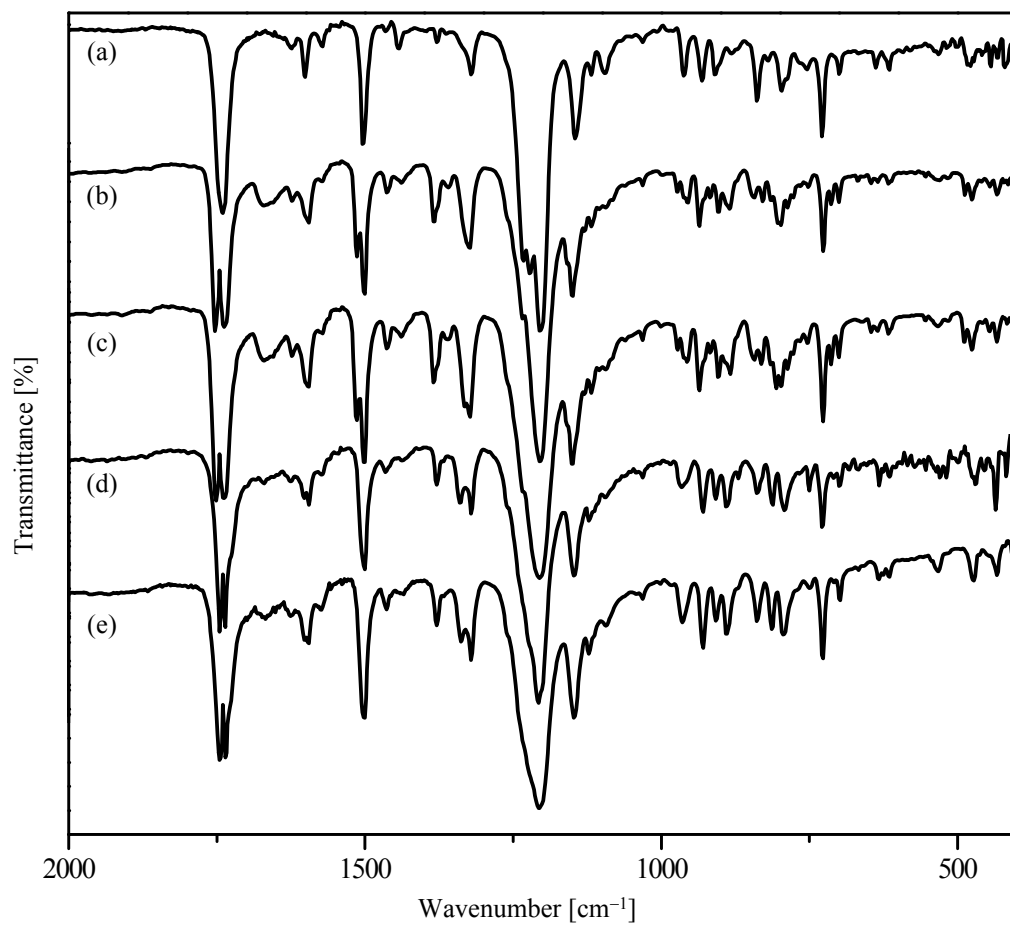

**Fig. S1** IR spectra of L (a),  $[\text{CuCl}_2\text{L}]_2$  (b),  $[\text{CuBr}_2\text{L}]_2$  (c),  $[\text{HgCl}_2\text{L}]_2$  (d), and  $[\text{HgBr}_2\text{L}]_2$  (e).

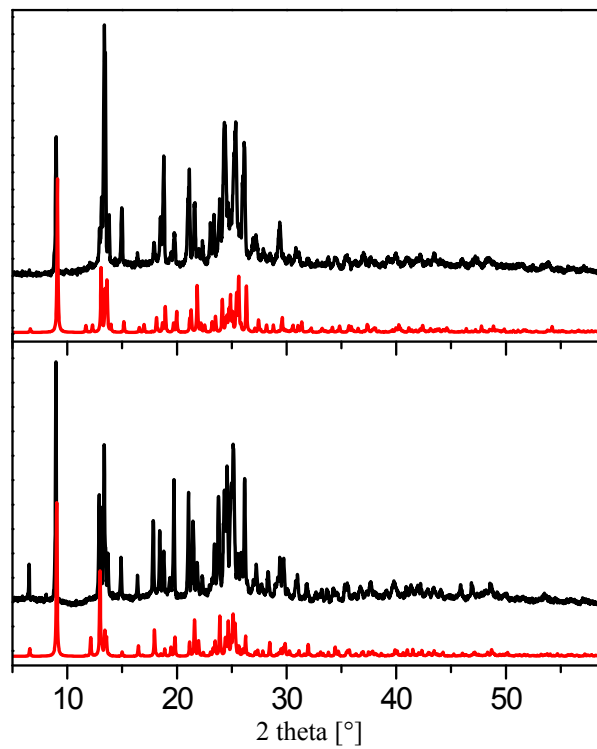

**Fig. S2** Powder XRD patterns (black lines) for  $[\text{CuCl}_2\text{L}]_2$  (a) and  $[\text{CuBr}_2\text{L}]_2$  (b) along with the simulated pattern (red line) from single-crystal X-ray diffraction data.

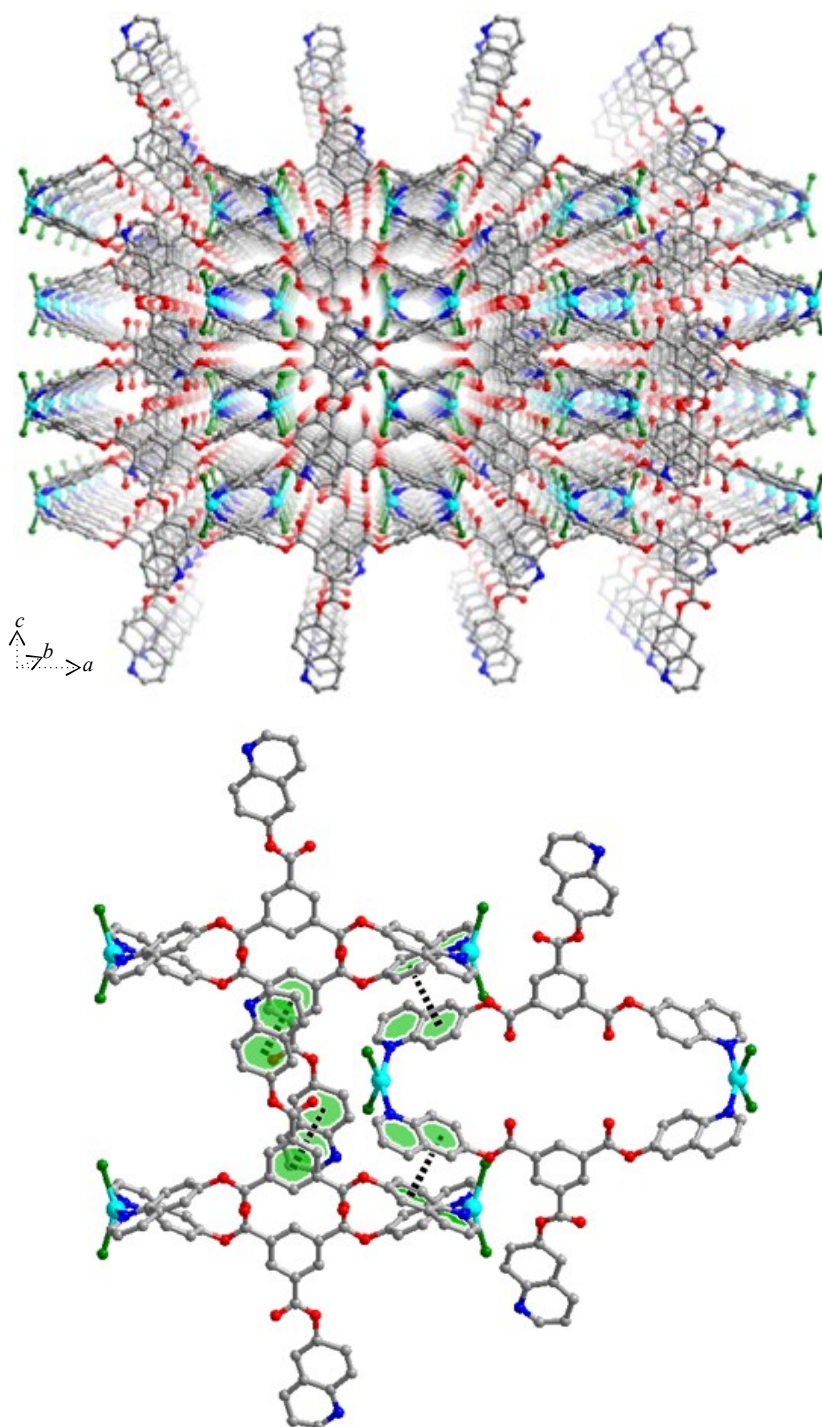

**Fig. S3** Top: Crystal structure of  $[\text{CuCl}_2\text{L}]_2$  showing packing diagram (top) and  $\pi \cdots \pi$  interactions between the adjacent quinolinyl groups and between quinolinyl and central phenyl group in the solid state (bottom).

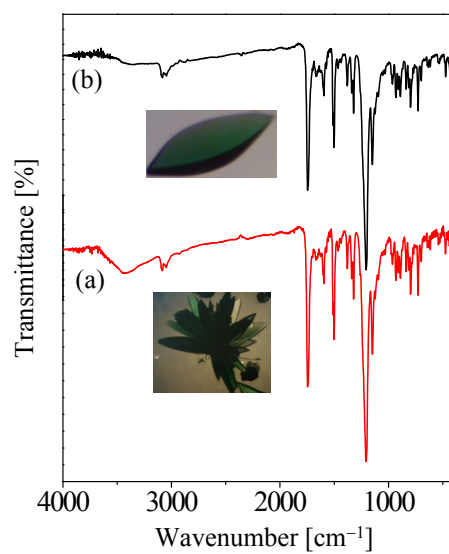

**Fig. S4** IR spectra of  $[\text{CuCl}_2\text{L}]_2$  aggregates (a) representing the existence of water molecules in contrast to single crystal (b).

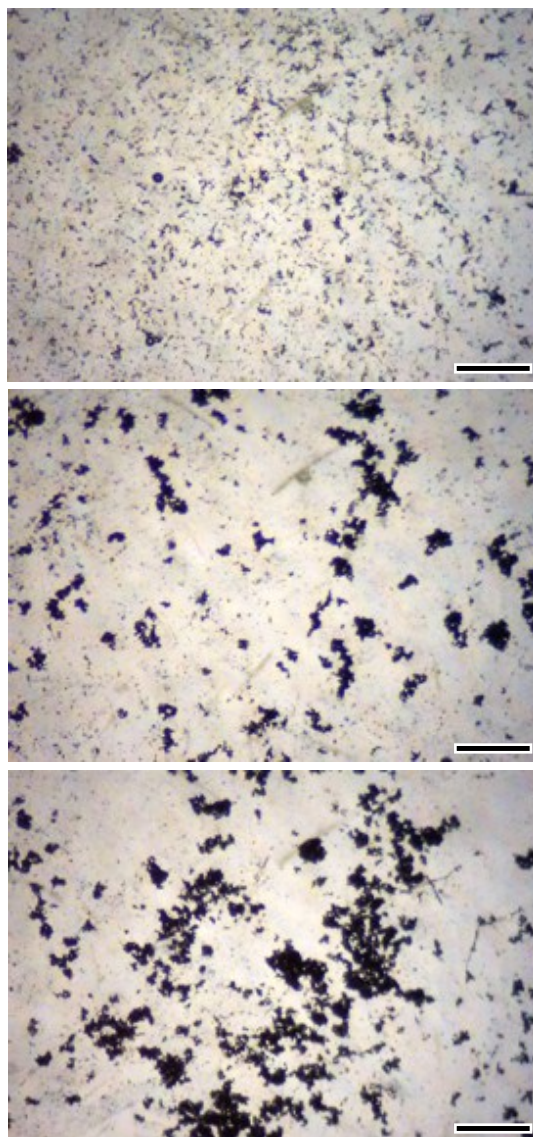

**Fig. S5** Optical microscopic images showing self-aggregation of  $[\text{HgCl}_2\text{L}]_2$  microcrystals in an aqueous solution: top, initial state; middle, after 12 h; bottom, after 1 day. Bar = 600  $\mu\text{m}$ .



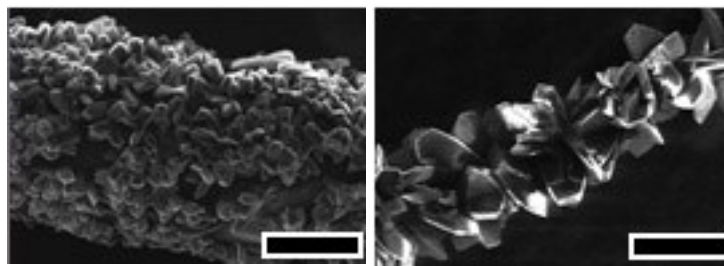

**Fig. S6** SEM images of [CuX<sub>2</sub>L]<sub>2</sub>@cotton (left) and [CuX<sub>2</sub>L]<sub>2</sub>@glass (right) showing crystal growth in the presence of glass-fiber and cotton-thread, respectively.

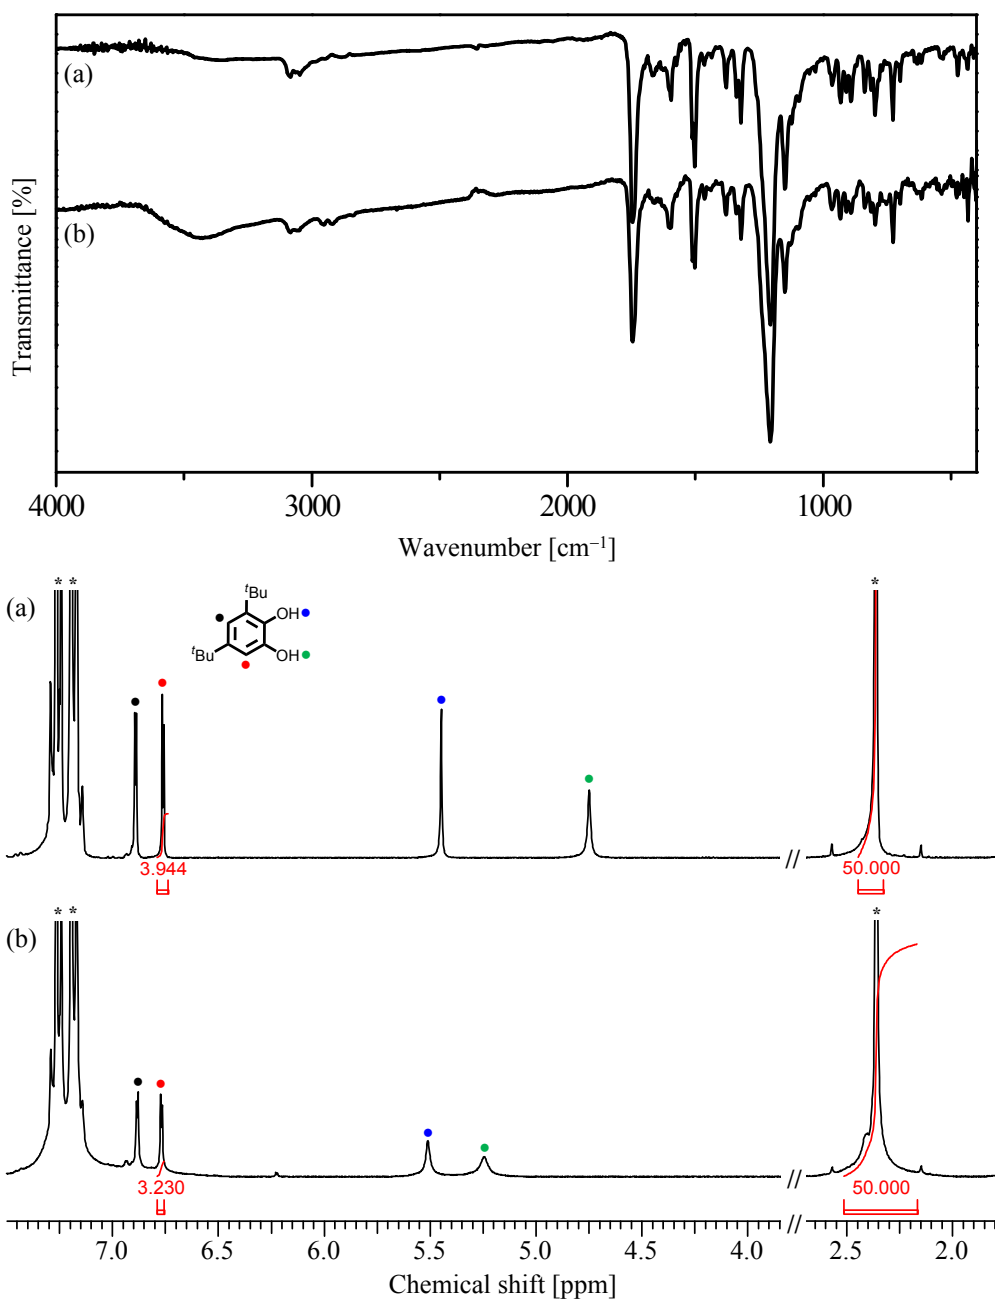

**Fig. S7** Top: IR spectra of  $[\text{CuCl}_2\text{L}]_2$  crystals before (a) and after (b) adsorption of 3,5-DBCat on the surface. 73 mg of  $[\text{CuCl}_2\text{L}]_2$  crystals were immersed in a  $\text{CDCl}_3$  solution of 3,5-DBCat at  $-15\text{ }^\circ\text{C}$  for 6 h. Bottom:  $^1\text{H}$  NMR spectra of the  $\text{CDCl}_3$  solution before (a) and after (b) adsorption. Asterisks denote the resonances corresponding to toluene used as an internal reference.

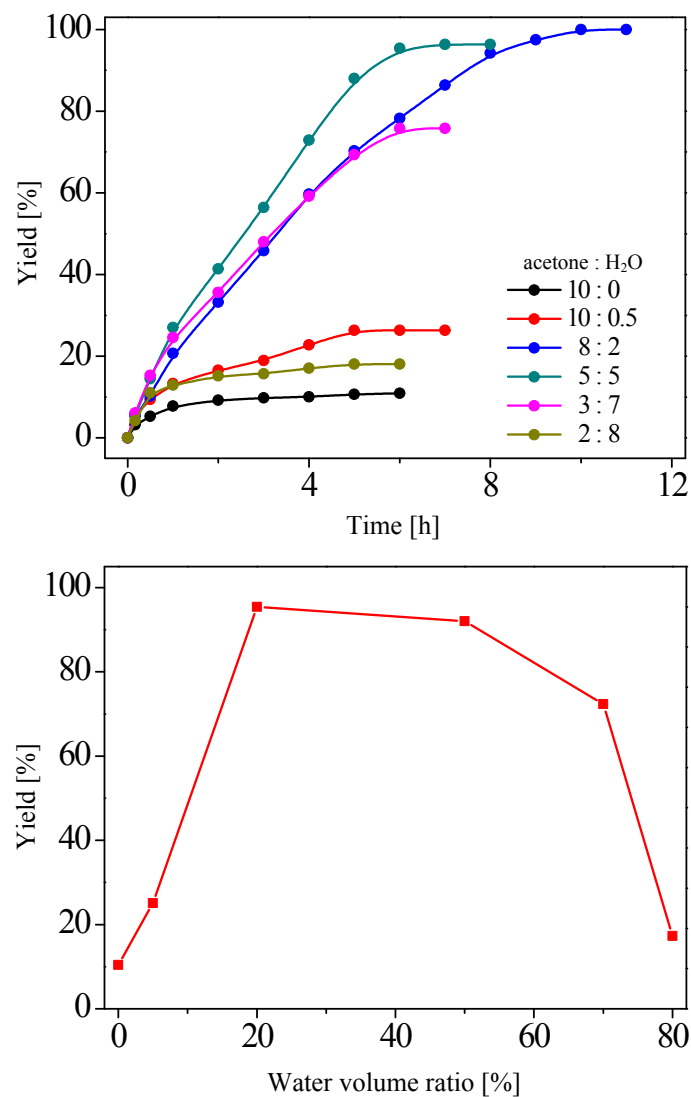

**Fig. S8** Top: plot showing catalytic oxidation yields of 3,5-DBCat as a function of time using [CuCl<sub>2</sub>L]<sub>2</sub> in a various mixture of acetone and water at 50 °C. Bottom: the final oxidation yield of 3,5-DBCat as a function of water volume ratio.

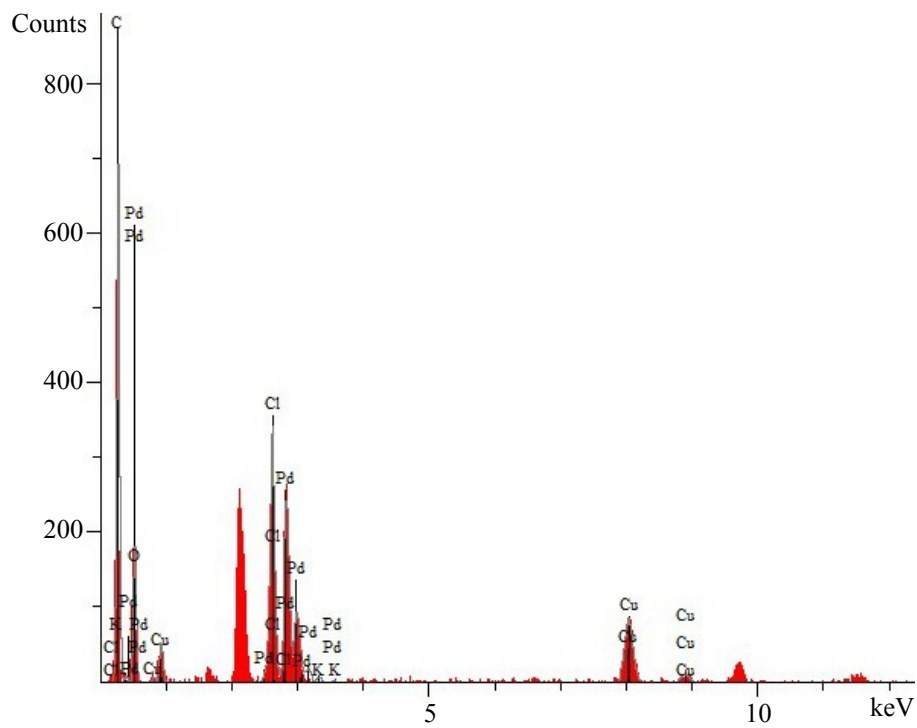

**Fig. S9** SEM-EDX data for PdCl<sub>2</sub>@[CuCl<sub>2</sub>L]<sub>2</sub>.
